# Supplementary material for: The Sustainable Approaches in the Processes of Cheese with Eyes: A Life Cycle Perspective, Hotspots and Scenarios
Source: Research Square preprint supplement (doi:10.21203/rs.3.rs-8756899/v1), 2026-02-23
Supplement: Supplementary file 1 [file b12f8c6fb4804c703a48e52c.docx]

Highlights:

- Addressed the environmental impacts of Izmir Tulum, filling a gap in LCA studies for cheeses.
- Conducted cradle-to-gate LCA; covering raw milk and cheese processing stages.
- Used ISO 14040/14044 standards, GaBi software, CML 2016 method with primary data.
- Raw milk production is a major environmental impact.
- Electricity, steam usage, and waste disposal are key contributors to Global Warming Potential (GWP) and Human Toxicity Potential (HTP).
- As a sustainable strategy, transition to photovoltaic energy significantly reduces GWP.
- Renewable energy and improved logistics can greatly mitigate environmental impacts.
